# Supplementary material
Source: Springer Nature journal article supplement (https://www.springermedizin.de/resource/supplementary/12879_2007_630_MOESM2_ESM.pdf/9449388)

### Treatment Group

- Artemisinin single rectal
- Artesunate single rectal 10mg/kg
- Artemisinins parenteral

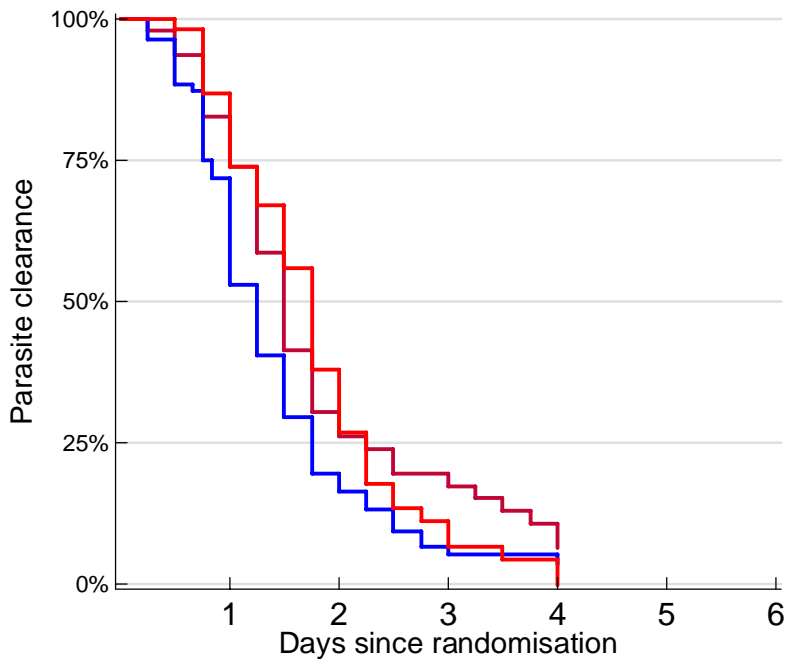

Supplement: MOESM2 [file 9449388]
